# Supplementary material for: Birth weight and large for gestational age trends in offspring of pregnant women with gestational diabetes mellitus in southern China, 2012-2021
Source: PubMed Central journal article supplement (PMC10194652; doi:10.3389/fendo.2023.1166533), 2023-05-04
Supplement: DataSheet_1.pdf [file DataSheet_1.pdf]

Supplementary Table 1 Trends in full-term singleton liveborn birth weight in women with and without GDM between 2012 and 2021

| Year                      | Total No. | GDM No. | Birth weight (kg) |               | <i>P</i> -value | Birth weight z score |                | <i>P</i> -value |
|---------------------------|-----------|---------|-------------------|---------------|-----------------|----------------------|----------------|-----------------|
|                           |           |         | Non-GDM           | GDM           |                 | Non-GDM              | GDM            |                 |
| 2012                      | 8071      | 1375    | 3.257 ± 0.402     | 3.319 ± 0.405 | < 0.001         | 0.052 ± 0.902        | 0.253 ± 0.899  | < 0.001         |
| 2013                      | 7694      | 1225    | 3.252 ± 0.395     | 3.278 ± 0.422 | 0.042           | 0.041 ± 0.881        | 0.150 ± 0.950  | < 0.001         |
| 2014                      | 8983      | 1300    | 3.249 ± 0.392     | 3.282 ± 0.440 | 0.006           | 0.002 ± 0.887        | 0.132 ± 0.967  | < 0.001         |
| 2015                      | 9461      | 1468    | 3.252 ± 0.397     | 3.275 ± 0.434 | 0.041           | -0.016 ± 0.888       | 0.091 ± 0.974  | < 0.001         |
| 2016                      | 10959     | 1756    | 3.259 ± 0.393     | 3.279 ± 0.418 | 0.047           | 0.030 ± 0.879        | 0.137 ± 0.912  | < 0.001         |
| 2017                      | 12820     | 2162    | 3.255 ± 0.387     | 3.244 ± 0.398 | 0.23            | 0.005 ± 0.867        | 0.033 ± 0.910  | 0.183           |
| 2018                      | 12130     | 2036    | 3.252 ± 0.384     | 3.272 ± 0.420 | 0.031           | -0.014 ± 0.863       | 0.095 ± 0.944  | < 0.001         |
| 2019                      | 13233     | 2049    | 3.237 ± 0.382     | 3.256 ± 0.408 | 0.043           | -0.046 ± 0.852       | 0.065 ± 0.919  | < 0.001         |
| 2020                      | 11473     | 1942    | 3.255 ± 0.387     | 3.246 ± 0.416 | 0.336           | 0.002 ± 0.861        | 0.047 ± 0.924  | 0.038           |
| 2021                      | 11335     | 2144    | 3.220 ± 0.383     | 3.211 ± 0.391 | 0.333           | -0.076 ± 0.848       | -0.030 ± 0.887 | 0.023           |
| <i>P</i> -value for trend |           |         | 0.075             | 0.001         |                 | 0.006                | 0.001          |                 |

Supplementary Table 2 Trends of prevalence of full-term singleton liveborn macrosomia and LGA in women with and without GDM between 2012 and 2021

| Year                      | Macrosomia, prevalence (95% CI) |                 | <i>P</i> -value | Large for gestational age, prevalence (95% CI) |                    | <i>P</i> -value |
|---------------------------|---------------------------------|-----------------|-----------------|------------------------------------------------|--------------------|-----------------|
|                           | Non-GDM                         | GDM             |                 | Non-GDM                                        | GDM                |                 |
| 2012                      | 3.8 (3.3 - 4.2)                 | 5.7 (4.5 – 7.0) | 0.001           | 8.6 (7.9 - 9.3)                                | 12.3 (10.6 - 14.1) | < 0.001         |
| 2013                      | 3.6 (3.2 - 4.1)                 | 5.0 (3.9 - 6.3) | 0.025           | 8.1 (7.4 - 8.8)                                | 12.0 (10.3 - 13.9) | < 0.001         |
| 2014                      | 3.3 (2.9 - 3.7)                 | 5.5 (4.3 - 6.8) | < 0.001         | 7.4 (6.8 – 8.0)                                | 11.5 (9.8 - 13.3)  | < 0.001         |
| 2015                      | 3.3 (2.9 - 3.7)                 | 5.2 (4.1 - 6.4) | < 0.001         | 7.3 (6.7 - 7.9)                                | 11.2 (9.6 - 12.9)  | < 0.001         |
| 2016                      | 3.7 (3.3 - 4.1)                 | 5.2 (4.3 - 6.4) | 0.002           | 7.8 (7.3 - 8.4)                                | 10.8 (9.4 - 12.3)  | < 0.001         |
| 2017                      | 3.7 (3.3 – 4.0)                 | 3.9 (3.2 - 4.8) | 0.541           | 7.2 (6.8 - 7.7)                                | 9.4 (8.3 - 10.7)   | < 0.001         |
| 2018                      | 3.2 (2.8 - 3.5)                 | 5.0 (4.1 – 6.0) | < 0.001         | 7.1 (6.6 - 7.6)                                | 10 (8.8 - 11.4)    | < 0.001         |
| 2019                      | 2.8 (2.5 - 3.1)                 | 4.5 (3.7 - 5.5) | < 0.001         | 6.2 (5.7 - 6.6)                                | 9.2 (8.0 - 10.5)   | < 0.001         |
| 2020                      | 3.7 (3.3 - 4.1)                 | 4.7 (3.9 - 5.8) | 0.032           | 7.1 (6.6 - 7.6)                                | 9.3 (8.1 - 10.7)   | 0.001           |
| 2021                      | 2.6 (2.3 - 2.9)                 | 3.2 (2.5 – 4.0) | 0.100           | 5.7 (5.3 - 6.2)                                | 7.9 (6.8 - 9.1)    | < 0.001         |
| <i>P</i> -value for trend | 0.082                           | 0.001           |                 | 0.010                                          | < 0.001            |                 |
